# Supplementary material for: Heterogeneous catalytic ozonation of ciprofloxacin in aqueous solution using a manganese-modified silicate ore
Source: Royal Society of Chemistry journal article supplement (doi:10.1039/c8ra06880a), 2018-01-01
Supplement: c8ra06880a1.pdf [file c8ra06880a1.pdf]

## Supporting Information

### **Heterogeneous catalytic ozonation of ciprofloxacin in aqueous solution using a manganese-modified silicate ore**

Lisha Luo<sup>ab</sup>, Donglei Zou<sup>a</sup>, Dongwei Lu<sup>c\*</sup>, Bingjing Xin<sup>b</sup>, Ming Zhou<sup>b</sup>, Xuedong Zhai<sup>c</sup> and Jun Ma<sup>c\*</sup>

*<sup>a</sup> Key Laboratory of Ministry of Education for Groundwater Resources and Environment, College of New Energy and Environment, Jilin University, Changchun 130000, P. R. China*

*<sup>b</sup> Jilin Institute of Chemical Technology, Jilin 130022, P. R. China*

*<sup>c</sup> State Key Laboratory of Urban Water Resource and Environment, Harbin Institute of Technology, Harbin 150090, PR China. E-mail: lvdongwei@hit.edu.cn*

**Table S1** BET of the SO and MnSO

| Sample | BET<br>( $\text{m}^2 \text{g}^{-1}$ ) | Pore volume<br>( $\text{cm}^3 \text{g}^{-1}$ ) | Average pore<br>size (nm) |
|--------|---------------------------------------|------------------------------------------------|---------------------------|
| SO     | 75.56                                 | 0.24                                           | 12.95                     |
| MnSO   | 59.11                                 | 0.16                                           | 10.9                      |

**Table S2** First-order kinetic parameters of the CIP removal during different oxidation processes

|                     | $k$ ( $\text{min}^{-1}$ ) | $R^2$  |
|---------------------|---------------------------|--------|
| SO/O <sub>2</sub>   | 0.014                     | 0.9934 |
| MnSO/O <sub>2</sub> | 0.009                     | 0.9940 |
| O <sub>3</sub>      | 0.025                     | 0.9993 |
| SO/O <sub>3</sub>   | 0.043                     | 0.9955 |
| MnSO/O <sub>3</sub> | 0.083                     | 0.9968 |

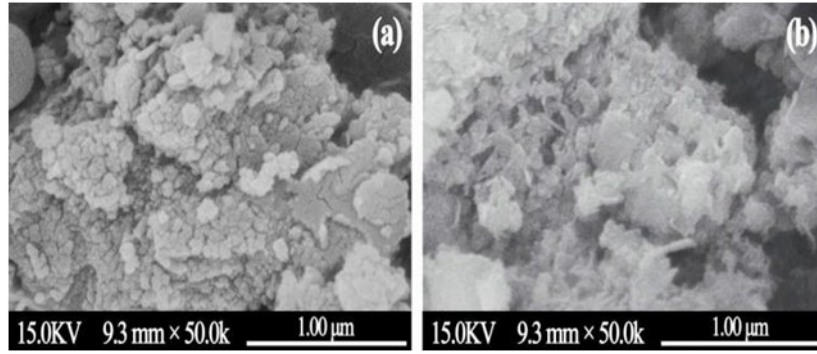

**Fig. S1** SEM images of the samples SO (a) and MnSO (b).

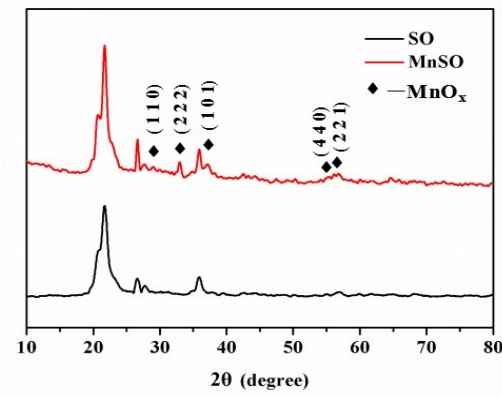

**Fig. S2** XRD of the SO and MnSO catalyst.

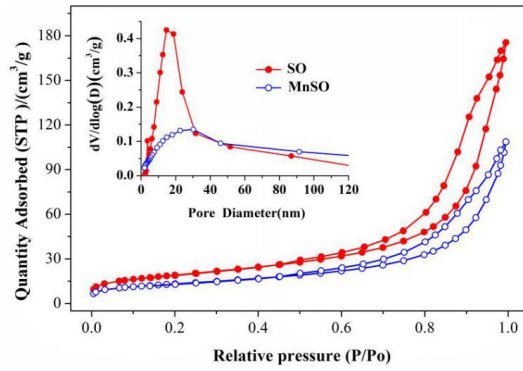

**Fig. S3** N<sub>2</sub> adsorption-desorption isotherms of the SO and MnSO

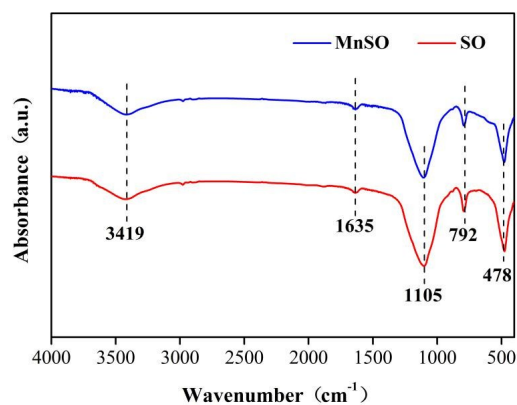

**Fig. S4** FTIR spectra of SO and MnSO.

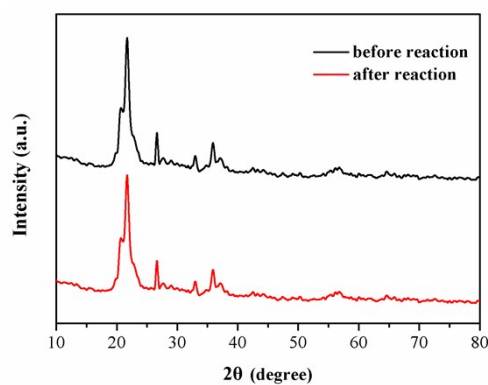

**Fig. S5** XRD of MnSO before and after catalytic ozonization of CIP

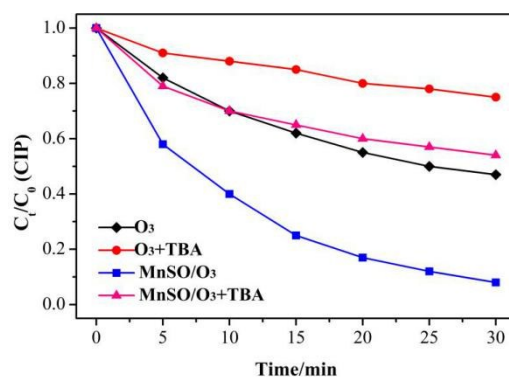

**Fig. S6** Effect of TBA on CIP degradation.

(experimental conditions: pH = 7.0,  $C_0 = 20 \text{ mg L}^{-1}$ ; ozone gas flow rate =  $0.3 \text{ L min}^{-1}$ ; ozone gas concentration =  $0.4 \text{ mg min}^{-1}$ ; catalyst dose =  $0.5 \text{ g L}^{-1}$ ;  $T = 20 \text{ }^\circ\text{C}$ ; TBA =  $100 \text{ mg L}^{-1}$ ).

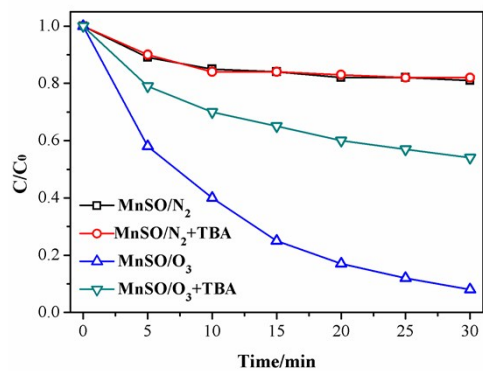

**Fig. S7** The system of replace O<sub>3</sub> by N<sub>2</sub> on CIP degradation.

(experimental conditions: pH = 7.0, C<sub>0</sub> = 20 mg L<sup>-1</sup>; N<sub>2</sub> flow rate = 0.3 L min<sup>-1</sup>; catalyst dose = 0.5 g L<sup>-1</sup>; T = 20 °C; ozone gas flow rate = 0.3 L min<sup>-1</sup>; ozone gas concentration = 0.4 mg min<sup>-1</sup>; TBA=100 mg L<sup>-1</sup>).
